# Supplementary material for: Aqueous RAFT/MADIXpolymerisation of N-vinyl pyrrolidone at ambient temperature
Source: Royal Society of Chemistry journal article supplement (doi:10.1039/c1py00373a), 2011-10-14
Supplement: c1py00373a.pdf [file c1py00373a.pdf]

## Electronic Supplementary Information (ESI)

# Aqueous RAFT/MADIX Polymerisation of *N*-Vinyl Pyrrolidone at Ambient Temperature.

Aymeric Guinaudeau,<sup>a</sup> Stéphane Mazières,<sup>a</sup> D. James Wilson<sup>b</sup> and Mathias Destarac<sup>\*a</sup>

## Summary of the Supplementary Information document

|                                                       |   |
|-------------------------------------------------------|---|
| I. Materials, Synthesis, Characterisation             | 2 |
| II. <sup>1</sup> NMR spectroscopy analysis of PVP-XA1 | 4 |
| III. MALDI-TOF mass spectrometry analysis of PVP-XA1  | 5 |

---

<sup>a</sup>Université Paul Sabatier, Laboratoire Hétérochimie Fondamentale et Appliquée, UMR-CNRS 5069, Bât 2R1, 118, route de Narbonne, 31062 Toulouse Cedex 9, France

<sup>b</sup>Rhodia Opérations, Centre de Recherches et Technologies d'Aubervilliers, 52 rue de la Haie Coq, 93308 Aubervilliers Cedex, France

To whom correspondence should be addressed:

E-mail: [destarac@chimie.ups-tlse.fr](mailto:destarac@chimie.ups-tlse.fr)

**Materials.** N-Vinylpyrrolidone (NVP, Acros, 98%) was dried over anhydrous magnesium sulphate and distilled under reduced pressure. 2,2'-Azobisisobutyronitrile (AIBN, Fluka) was recrystallized three times in methanol. Ethanol (EtOH, Normapur), *t*-butyl hydroperoxyde (*t*BuOOH, Aldrich, 70 wt. % in water) and L(+) Ascorbic Acid (AscAc, Acros, 99%) were used as received. *O*-ethyl-S-(1-methoxycarbonyl)ethylthiocarbonate (XA1) and Acrylamide (Am, 50 wt. % in water) were supplied by Rhodia and used as received.

**Redox-initiated, aqueous RAFT/MADIX polymerisation of NVP.** A typical polymerisation was performed as follows: XA1 (122 mg,  $5.8 \times 10^{-4}$  mol), NVP (5 g,  $4.5 \times 10^{-2}$  mol), distilled water (2,5 mL) and *t*-BuOOH (85 mg,  $6.6 \times 10^{-4}$  mol) were placed in a 15-mL Schlenk flask. The polymerisation mixture was degassed by purging with ultra-high purity argon during 20 minutes. AscAc (115 mg,  $6.5 \times 10^{-4}$  mol) was added one-pot under a stream of argon. The reaction was stopped after 24 h at room temperature. NVP conversion was determined by  $^1\text{H}$  NMR (97%). Molecular weight and dispersity were determined by SEC in DMF/LiCl with PMMA standards ( $M_{n,SEC} = 14\,600 \text{ g}\cdot\text{mol}^{-1}$ ,  $\bar{D} = 1,30$ ).

**Redox-initiated RAFT/MADIX polymerisation of acrylamide.** An acrylamide prepolymer was synthesized as follows to perform a further block copolymerisation: XA1 (220 mg,  $1.1 \times 10^{-3}$  mol), Ethanol (EtOH, 3.3 g,  $7.2 \times 10^{-2}$  mol), Am (10 g,  $7 \times 10^{-2}$  mol), distilled water (2,5 mL) and *t*-BuOOH (171 mg,  $1.3 \times 10^{-3}$  mol) were placed in a 15-mL Schlenk flask. The polymerisation mixture was degassed by purging with ultra-high purity argon during 20 mn. AscAc (182 mg,  $1.2 \times 10^{-3}$  mol) was added one-pot under a stream of argon. The reaction was stopped after 24h at room temperature. The monomer conversion reached 99% (determined by  $^1\text{H}$  NMR). Ethanol was then evaporated under reduced pressure. Molecular weight and dispersity were determined by  $^1\text{H}$  NMR ( $M_{n,RMN} = 1200 \text{ g}\cdot\text{mol}^{-1}$ ) and by SEC in DMF/LiCl with PMMA standards ( $M_{n,POE} = 3600 \text{ g}\cdot\text{mol}^{-1}$ ,  $\bar{D} = 1,07$ ).

**Redox-initiated RAFT/MADIX block copolymerisation of NVP.** Pam (prepared according to the procedure described above) (300 mg,  $6 \times 10^{-5}$  mol), *t*-BuOOH (19 mg,  $1.5 \times 10^{-4}$  mol), distilled water (1,3 mL) and NVP (0.5 g,  $3.5 \times 10^{-3}$  mol) were placed in a 15-mL Schlenk flask. The polymerisation mixture was degassed by purging with ultra-high purity argon during 20 mn. AscAc (23 mg,  $1.3 \times 10^{-4}$  mol) was added one-pot under a stream of argon. The reaction was stopped after 8 h of stirring at room temperature. Molecular weight and dispersity were determined by SEC in DMF/LiCl with PMMA standards ( $M_{n,SEC} = 12200 \text{ g}\cdot\text{mol}^{-1}$ ,  $\bar{D} = 1,25$ ).

**PVP purification.** PVP was isolated by diluting the sample in dichloromethane and precipitating in diethylether (three times). The polymer was then dried under vacuum at 40°C during 10 h.

## Characterization

$^1\text{H}$ -NMR were recorded on Bruker AMX 300, at 300 MHz, in  $\text{D}_2\text{O}$ .

A SEC system, comprising two Shodex K-805L columns (8mm\*300mm, 13 $\mu\text{m}$ ), a UV detector and a RI detector using DMF/LiCl (0,1 N) as the eluent at 40°C with a flow rate of 1mL.min $^{-1}$  was used. This system was calibrated using narrow poly(methyl methacrylate) standards ranging from 900 to 625 000 g.mol $^{-1}$ . Toluene was used as a flow marker.

MALDI-TOF MS measurements were performed on an applied Biosystems Voyager System 4243. Positive-ion spectra were acquired in the reflector mode. The matrix was 4-(4-nitrophenylazo)resorcinol. There was no cationisation agent. The polymer sample and the matrix were dissolved in dichloromethane and premixed in a 1:10 ratio.

$$DP_{n, RMN} = \frac{e) + i)}{i)} = \frac{i) + \frac{(a) + e) + f)}{3} - 5i)}{i)} \quad (4.1)$$

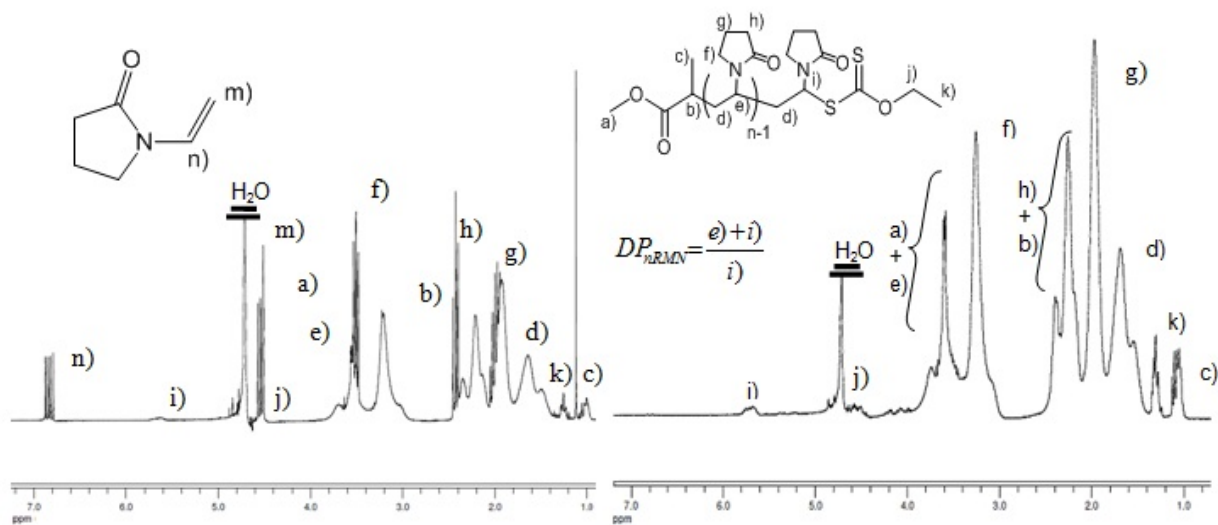

**Fig. S1** <sup>1</sup>H NMR spectrum of a PVP synthesized by XA1-mediated RAFT/MADIX polymerisation in water at 25°C, reaction medium (left) and purified polymer (right)

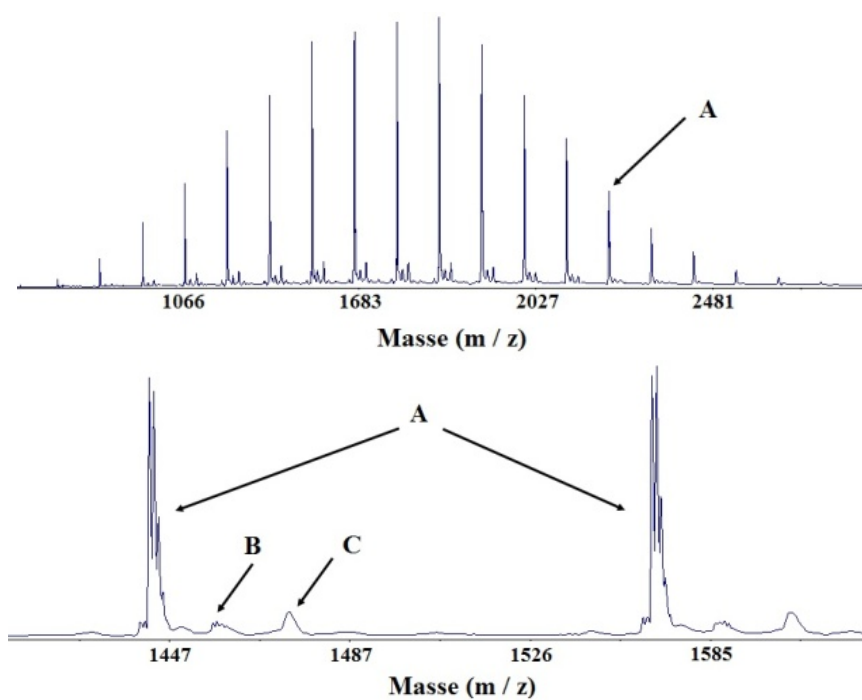

**Fig S2** MALDI-TOF mass spectrum of a PVP synthesized by XA1-mediated RAFT/MADIX polymerisation in water at 25°C for 24h, then left in the reaction medium for 5 additional days.  $M_n$  NMR=1600 g.mol<sup>-1</sup>. A=CH<sub>3</sub>OCOCH<sub>3</sub>CH-(NVP)<sub>n-1</sub>-CH=CH(C<sub>4</sub>H<sub>6</sub>NO) (Na<sup>+</sup>), B=CH<sub>3</sub>OCOCH<sub>3</sub>CH-(NVP)<sub>n-1</sub>-CH=CH(C<sub>4</sub>H<sub>6</sub>NO) (K<sup>+</sup>), C = CH<sub>3</sub>OCOCH<sub>3</sub>CH-(NVP)<sub>n</sub>-S(C=S)OCH<sub>2</sub>CH<sub>3</sub> (K<sup>+</sup>).
